# Supplementary material
Source: publisher figshare collection journal article supplement (https://frontiersin.figshare.com/ndownloader/files/33078197)
Supplement: Supplementary file [file 33078197]

## Supplemental Materials

| Primer Name          | Sequence (5'-3')                         | Region Analyzed            | Amplicon Size (bp) | Annealing Temp (°C) | Application        |
|----------------------|------------------------------------------|----------------------------|--------------------|---------------------|--------------------|
| hCTBP2-early-F1      | GGGGTAGGGTTAGGGA<br>GTGT                 | CTBP2 isoform<br>promoter  | 128                | 54                  | BS PCR             |
| hCTBP2-early-R1      | Bio-<br>CCCCTTCAAATACTCCT<br>CACTACAAAT  | CTBP2 isoform<br>promoter  | 128                | 54                  | BS PCR             |
| hCTBP2-early-seq1    | GTTTGTGTGTATTTT                          | CTBP2 isoform<br>promoter  | N/A                | N/A                 | Pyro<br>sequencing |
| hCTBP2-early-seq2    | GGGTTAGGGAGTGTT                          | CTBP2 isoform<br>promoter  | N/A                | N/A                 | Pyro<br>sequencing |
| hCTBP2-late-pro-F1   | TGGGAGGGTTGGATAG<br>AGTAAGT              | RIBEYE isoform<br>promoter | 143                | 54                  | BS PCR             |
| hCTBP2-late-pro-R1   | Bio-<br>CCCCCTTCCTAACTAAT<br>ATACTCACAT  | RIBEYE isoform<br>promoter | 143                | 54                  | BS PCR             |
| hCTBP2-late-pro-seq1 | GGTTGGATAGAGTAAG<br>TTAT                 | RIBEYE isoform<br>promoter | N/A                | N/A                 | Pyro<br>sequencing |
| hCTBP2-late-ex1-F1   | GTTTTTTTTTAGGGATT<br>GAGTTGTAAGGA        | RIBEYE isoform<br>exon 1   | 159                | 52                  | BS PCR             |
| hCTBP2-late-ex1-R1   | Bio-<br>AAACAACCAACTAAAA<br>ATTTTCTATTTC | RIBEYE isoform<br>exon 1   | 159                | 52                  | BS PCR             |
| hCTBP2-late-ex1-seq1 | GAGTTGTAAGGAATAG<br>ATTT                 | Ribeye isoform exon<br>1   | N/A                | N/A                 | Pyro<br>sequencing |

**Table S1. PCR and sequencing primers used in this study.** 5' biotinylation modification (Bio) is indicated on reverse pyrosequencing primers.

| chr  | start    | end      | MeanDiff | areaStat   | tstat.sd   |
|------|----------|----------|----------|------------|------------|
| Chr6 | 33218263 | 33218579 | 0.276    | 14.2838502 | 0.09668239 |
| Chr6 | 33245301 | 33246009 | 0.380    | 59.1333174 | 0.08986108 |
| Chr6 | 33249989 | 33250421 | 0.263    | 8.76293565 | 0.09013309 |

**Table S2. Quantitative analysis of 3 DNA hypermethylated methylated regions (DMR) in ED8 chicken retinas from low coverage whole genome bisulfite sequencing (WGBS).** WGBS was conducted in triplicate and is quantitative with associated statistics. The 1st 3 columns show the genome coordinates. MeanDiff represents the average methylation difference in a DMR region, The areaStat=area under the t-statistic curve is used for ranking the DMRs, and tstat.sd=standard deviation of the t.stat shows variation in the 3 replicates.

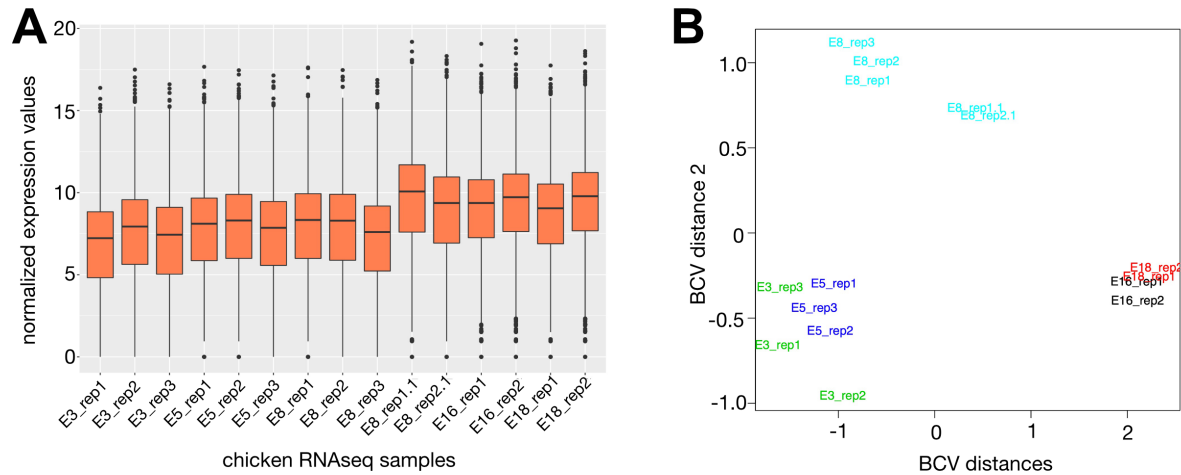

**Figure S1. TMM normalization and MDS of combined ED3-ED18 chicken RNA-seq data sets.** (A) A plot representing chicken retina RNA-seq data sets from two independent studies combined and normalized using the trimmed mean of M-values (TMM) functionality within the edgeR package. (B) An MDS plot output from EdgeR showing clustering among E3, E5, E8, 16 and 18 chick retinas.

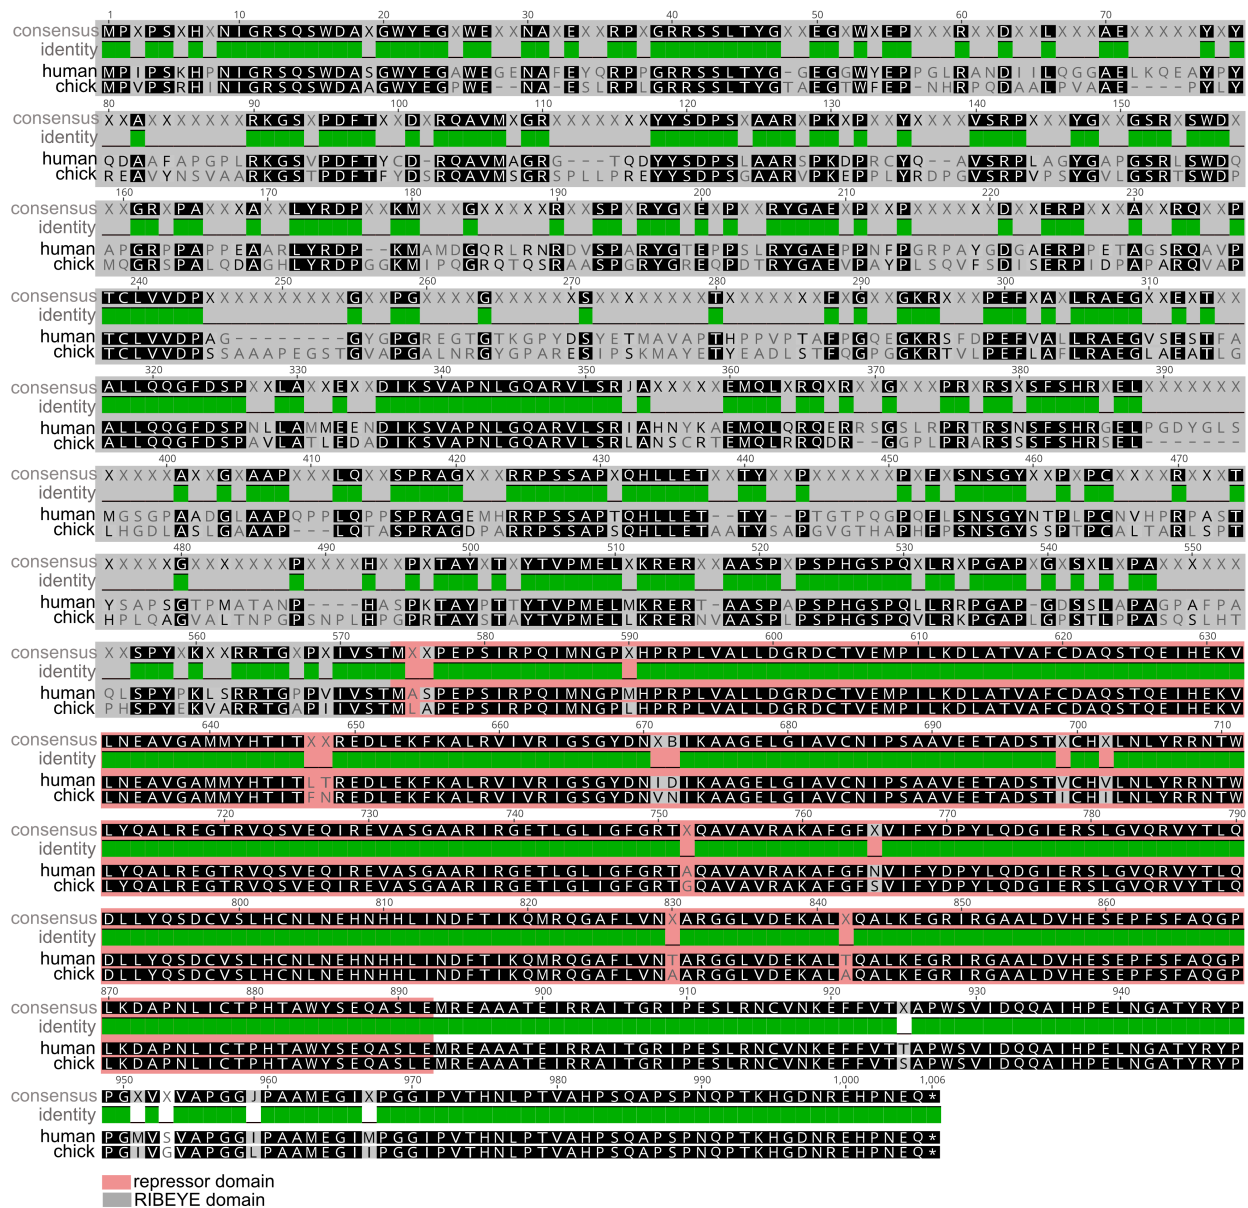

**Figure S2. Alignment of human and chick *RIBEYE*.** A pairwise alignment between the full-length chicken and human *RIBEYE* sequences. Identity between amino acids is highlighted with a black background and green bar above. The RIBEYE domain is shown with a grey background, while the conserved repressor domain is shown in red.



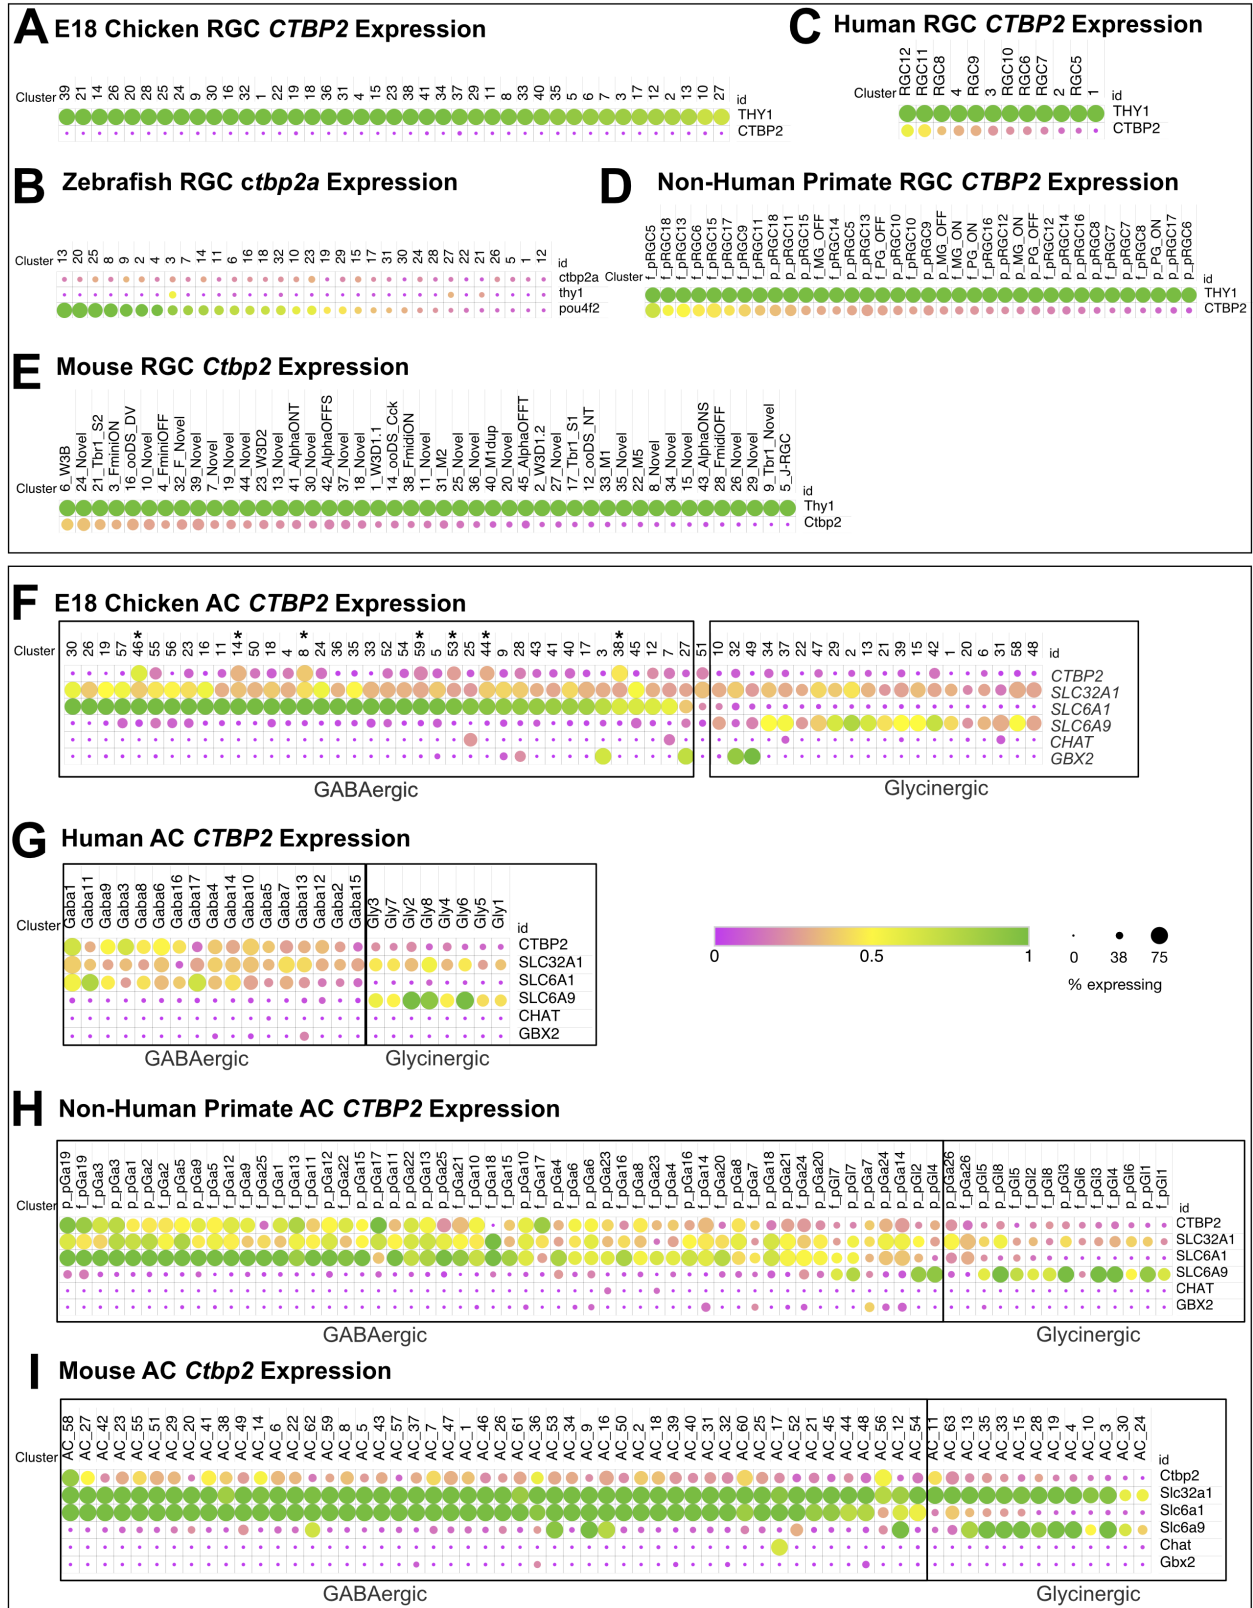

**Figure S4. Multispecies comparison of *CTBP2* expression in RGCs and amacrine cells.** Dot plots of scRNA-seq data collected from (A) the ED18 chicken, (B) zebrafish (C) human, (D) non-human primate and (E) mouse retina visualizing RGC co-expression of *CTBP2/RIBEYE* and *THY1* as well as amacrine cell

subtype-specific coexpression of *CTBP2/RIBEYE*, *SLC32A1*, *SLC6A1*, *SCL6A9*, *CHAT*, and *GBX2* from (F) the ED18 chicken, (G) human, (H) non-human primate and (I) mouse retina. All data were reanalyzed from previously published studies (1-4) using tools from the Broad Single Cell Portal ([https://singlecell.broadinstitute.org/single\\_cell](https://singlecell.broadinstitute.org/single_cell)).
